# Supplementary material
Source: MDPI journal article supplement (https://www.mdpi.com/2311-7524/7/8/251)
Supplement: s1 [file s1]

# Supplementary Materials: For a Better Understanding of the Effect of N Form on Growth and Chemical Composition of C<sub>3</sub> Vascular Plants under Elevated CO<sub>2</sub>—A Case Study with the Leafy Vegetable *Eruca sativa*

Lilian Schmidt and Jana Zinkernagel

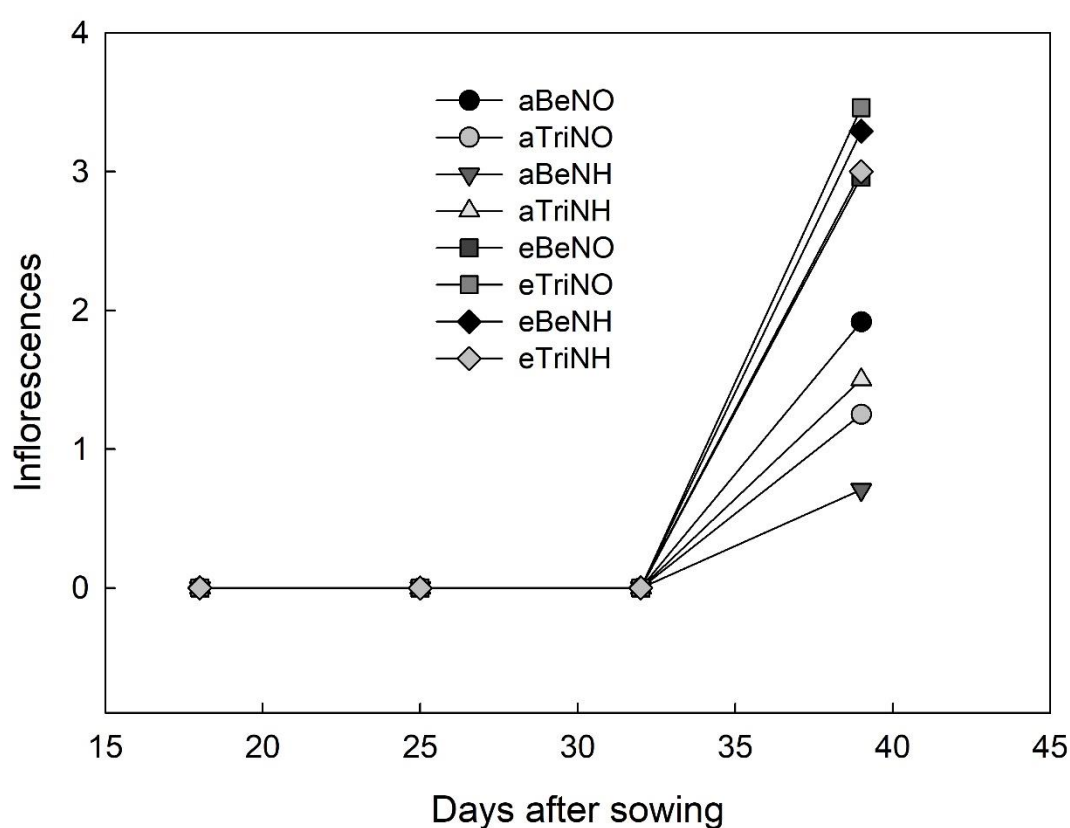

**Figure S1.** Number of inflorescences with at least one open flower observed from days 18 to 39 after the start of the experiments. Data are averages of  $n=3$ . No statistically significant differences at  $\alpha=0.05$  were observed.

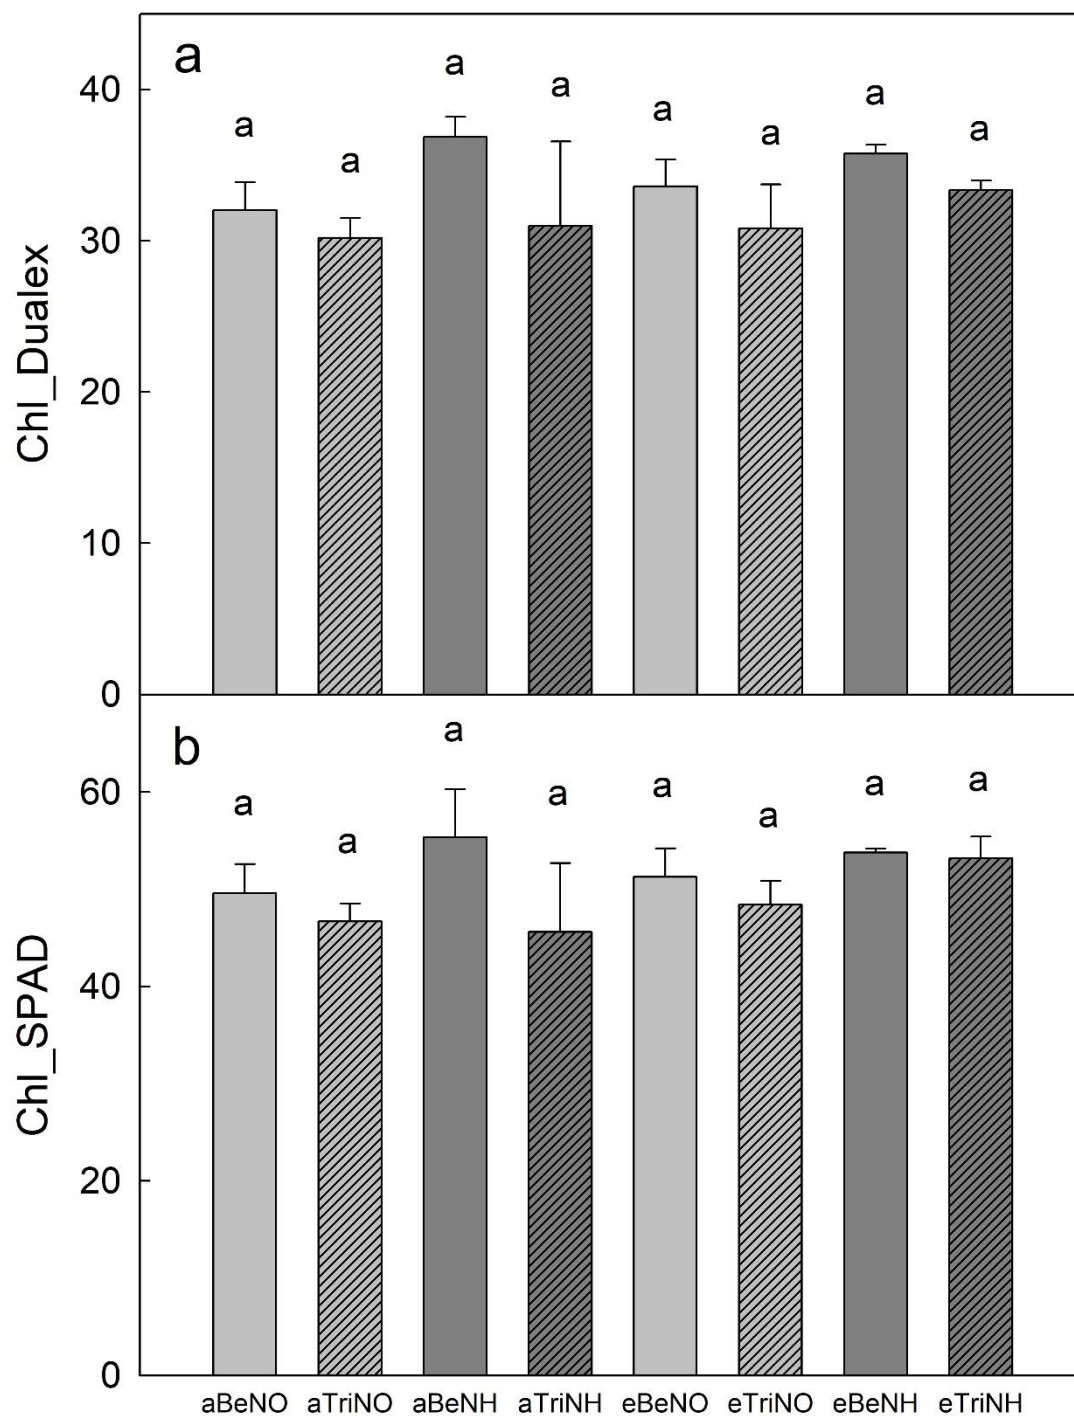

**Figure S2.** Indices for the chlorophyll content of the leaves as observed by non-invasive measurements with the Dualex (a) and the N-Tester (b). Averages of  $n=3$  and standard deviations are shown. No statistically significant differences at  $\alpha=0.05$  were observed.
